# Supplementary material for: NOX-like ROS production by glutathione reductase
Source: PubMed Central journal article supplement (PMC9519596; doi:10.1016/j.isci.2022.105093), 2022-09-08
Supplement: mmc1.pdf [file mmc1.pdf]

**iScience, Volume 25**

**Supplemental information**

**NOX-like ROS production by glutathione reductase**

**Julia M. Diaz and Xinying Shi**

Table S1. IC<sub>50</sub> values of DPI inhibition, related to Fig 4c and Fig S3

| Enzyme | Substrate or product        | IC <sub>50</sub> (μM) |
|--------|-----------------------------|-----------------------|
| ToGR1  | NADPH                       | 36.4                  |
|        | O <sub>2</sub> <sup>-</sup> | 7.9                   |
| ToGR2  | NADPH                       | 1831                  |
|        | O <sub>2</sub> <sup>-</sup> | 545                   |

Table S2. Uncatalyzed rate constants, related to Table 1 and STAR methods  
Data represent the avg. ± std. dev. of 22 observations

| Substrate or product        | k <sub>uncat</sub><br>(min <sup>-1</sup> ) | n  |
|-----------------------------|--------------------------------------------|----|
| NADPH                       | (2.3±0.9)×10 <sup>-4</sup>                 | 22 |
| GSH                         | (1.2±0.0)×10 <sup>-3</sup>                 | 22 |
| O <sub>2</sub> <sup>-</sup> | (8.4±5.7)×10 <sup>-4</sup>                 | 22 |

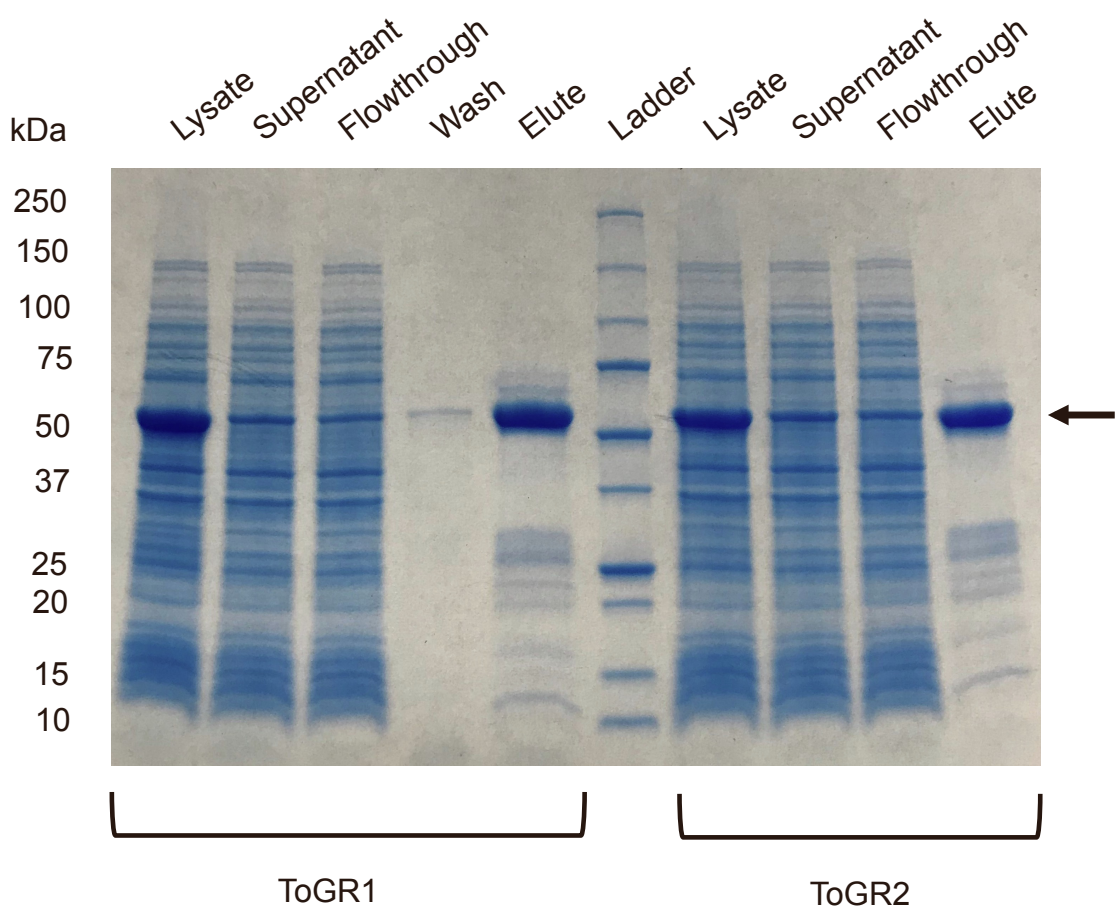

Fig S1. SDS-PAGE analysis of protein fractions obtained during the purification of recombinant ToGR1 and ToGR2, related to Fig 1a and STAR methods. Arrow indicates ~55 kDa

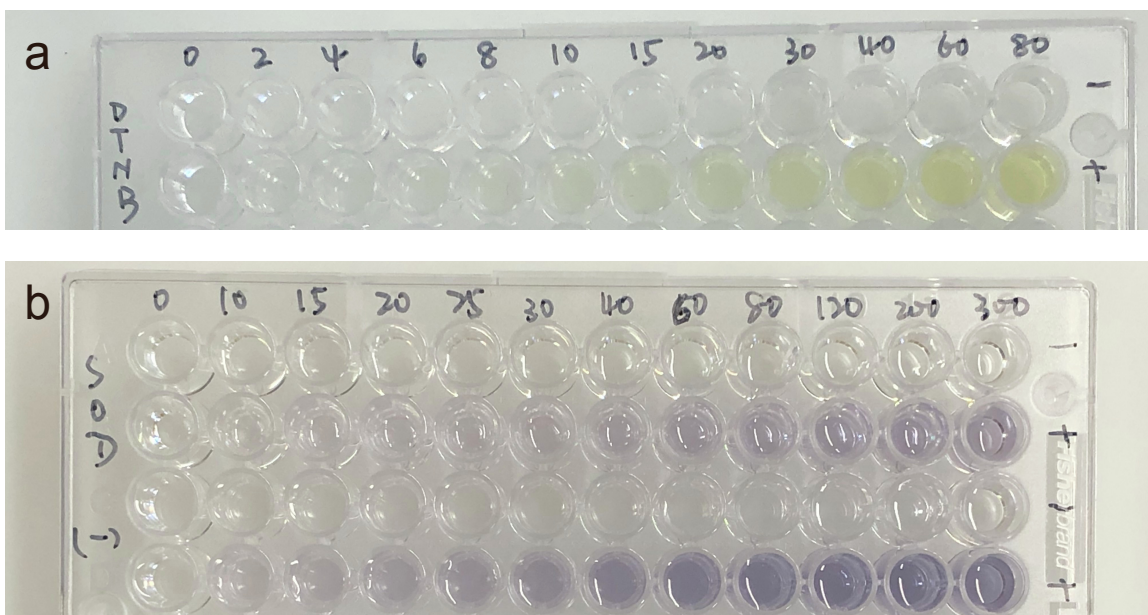

Fig S2. Activity assays showing color changes, related to Fig 1d,e and STAR methods. GSSG reduction (a) or superoxide production (b) by ToGR1. Top: NADPH concentration ( $\mu\text{M}$ ); Left: presence or absence (-) of SOD, as indicated; Right: presence (+) or absence (-) of ToGR1

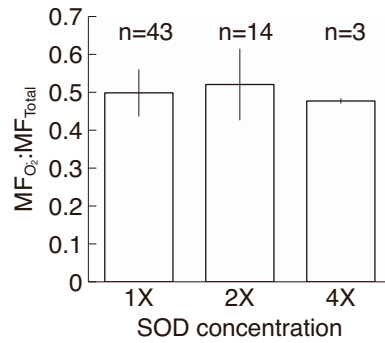

Fig S3. Proportion of superoxide-mediated monoformazan (MF) production by ToGR1 in the presence of increasing concentrations of superoxide dismutase (SOD), related to Fig 2c-f. 1X = 200 U mL<sup>-1</sup>. Data represent the avg. ± std. dev. of n observations indicated above each bar. Results were statistically similar across all levels of SOD ( $p \geq 0.55$ , Tukey HSD)

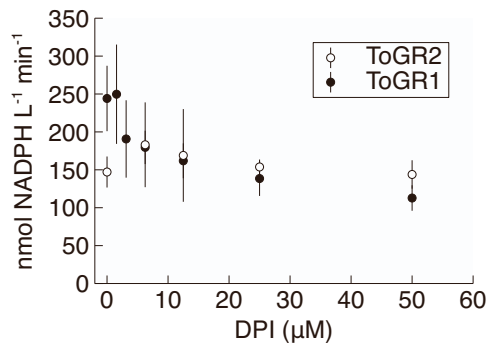

Fig S4. NADPH oxidation by ToGR1 and ToGR2 in the presence of DPI, related to Fig 4c. Data represent the avg. ± std. dev. of triplicate observations
